# Supplementary material for: High Expression of HSPA8 is A Favorable Prognostic Factor in Colon Cancer
Source: Research Square preprint supplement (doi:10.21203/rs.3.rs-1059713/v1), 2021-11-11
Supplement: Supplementary file 1 [file 5bfb8f5e3cd61ebf29f72860.xlsx]

## Sheet: Sheet 1
node1
