# Supplementary material for: High Expression of HSPA8 is A Favorable Prognostic Factor in Colon Cancer
Source: Research Square preprint supplement (doi:10.21203/rs.3.rs-1059713/v1), 2021-11-11
Supplement: Supplementary file 2 [file 665080ab45fb704b6c1074a0.xlsx]

## Sheet: Sheet 1
gene_name
